1 **Differential vaginal *Lactobacillus* species metabolism of glucose, L and D-lactate by <sup>13</sup>C-nuclear magnetic**  
2 **resonance spectroscopy**

3 Emmanuel Amabebe<sup>a</sup>, e.amabebe@sheffield.ac.uk

4 Dilly O. Anumba<sup>a</sup>, d.o.c.anumba@sheffield.ac.uk

5 Steven Reynolds<sup>b\*</sup>, steven.reynolds@sheffield.ac.uk

6 <sup>a</sup>Department of Oncology and Metabolism, University of Sheffield, Level 4, Jessop Wing, Tree Root Walk,  
7 Sheffield S10 2SF, UK.

8 <sup>b</sup>Department of Infection, Immunity and Cardiovascular Disease, University of Sheffield, Royal Hallamshire  
9 hospital, Glossop Road, Sheffield S10 2JF, UK

10 ***\*Corresponding author***

11 Dr Steven Reynolds, BSc (Hons), PhD

12 Academic Unit of Radiology, Department of Infection, Immunity and Cardiovascular Disease, University of  
13 Sheffield, Royal Hallamshire hospital, Glossop Road, Sheffield S10 2JF, UK. +44 114 215 9596,  
14 [steven.reynolds@sheffield.ac.uk](mailto:steven.reynolds@sheffield.ac.uk)

15

16 **Acknowledgements:**

17 We are grateful to the University of Sheffield, UK, for providing support and the 9.4T MRS spectrometer with  
18 which this study was performed.

19

20

21

22

23

24

25

26

27

28 **Abstract**

29 **Introduction**

30 Cervicovaginal dysbiosis can lead to infection-associated spontaneous preterm birth.

31 **Objective**

32 To determine whether vaginal *Lactobacillus* species, *L. crispatus* and *L. jensenii*, differentially metabolise glucose,  
33 L- and/or D-lactate to propagate their survival/dominance.

34 **Methods**

35 Bacteria were incubated anaerobically for 24h at 37°C, with  $^{13}\text{C}_6$ -glucose,  $^{13}\text{C}_3$ -D-lactate or  $^{13}\text{C}_3$ -L-lactate  
36 (singularly or combined) for 24h.  $^{13}\text{C}$ -spectra were acquired using a 9.4T NMR spectrometer.

37 **Results**

38 *L. crispatus* and *L. jensenii* (n=6 each) metabolised  $^{13}\text{C}$ -glucose to  $^{13}\text{C}$ -lactate and  $^{13}\text{C}$ -acetate. *L. jensenii*  
39 converted more  $^{13}\text{C}_3$ -D- or  $^{13}\text{C}_3$ -L-lactate to  $^{13}\text{C}$ -acetate than *L. crispatus*,  $p < 0.001$ .

40 **Conclusion**

41 Conversion of glucose and lactate to acetate by *L. jensenii* compared to *L. crispatus*, suggests a possibly important  
42 pathomechanism of dysbiosis and infection-associated spontaneous preterm birth.

43 **Keywords:** Preterm birth, vaginal lactobacilli, lactate, acetate,  $^{13}\text{C}$ -NMR.

44

45

46

47

48

49

50

51

52

53

## 54 **Introduction**

55 In conjunction with the host vaginal habitat, the vaginal bacteria produce unique metabolic by-products. In a  
56 healthy vagina, lactobacilli are the predominant species and have been linked to increased likelihood of term  
57 delivery (Amabebe and Anumba, 2018; Stafford *et al.*, 2017). The four major vaginal lactobacilli (*L. crispatus*, *L.*  
58 *jensenii*, *L. iners* and *L. gasseri*) differentially produce L- and D-lactic acid that lowers the pH of the  
59 cervicovaginal space, creating unfavourable conditions for other invading species. D-lactic acid is believed to be  
60 more potent than L-lactic acid in relation to protection against colonisation by potentially pathogenic organisms  
61 within the vagina and the accompanying inflammatory response (Witkin *et al.*, 2013). Anaerobes are also  
62 endogenous to the vagina and are associated with infection and preterm birth (PTB, i.e. delivery <37 weeks of  
63 gestation) especially when lactobacilli are deficient (Amabebe and Anumba, 2018).

64 Metabolism by cells can be tracked by <sup>13</sup>C-Nuclear Magnetic Resonance (NMR) to examine specific pathways  
65 (Buescher *et al.*, 2015). The use of <sup>13</sup>C labelled substrates means that they are metabolised identically to those  
66 found naturally, with the cell viability maintained throughout the experiment. Additionally, strategic placement  
67 of the <sup>13</sup>C label (Buescher *et al.*, 2015) allows the activity of single or multiple metabolic pathways to be identified,  
68 even if the end product is the same (Bruntz *et al.*, 2017).

69 Although, lactobacilli are known to thrive in the acidic condition of the vagina (pH < 4.5), the mechanism  
70 underpinning how lactobacilli, and other anaerobes, interact with lactic acid remains unresolved (Amabebe and  
71 Anumba, 2018). In this short communication, we report on the use of <sup>13</sup>C-NMR to examine how different  
72 *Lactobacillus* species (*L. crispatus* and *L. jensenii*) differentially metabolise glucose, L- and/or D-lactate to  
73 propagate their survival and dominance.

## 74 **Material and Methods**

### 75 *Bacterial culture*

76 One strain each of two common vaginal *Lactobacillus* species *L. crispatus* (ATCC 33820) and *L. jensenii* (ATCC  
77 25258) were cultured in De Man, Rogosa and Sharpe broth (MRS, Oxoid CM0359, Thermo Scientific,  
78 Bassingstoke, UK), under anaerobic (80% N<sub>2</sub>, 10% CO<sub>2</sub>, 10% H<sub>2</sub>) condition at 37°C for 24h. After this time, 50  
79 µl of bacteria in broth was transferred to 400 µl of fresh broth and then subcultured with the addition of 50 µl 100  
80 mM <sup>13</sup>C<sub>u</sub>-glucose, <sup>13</sup>C<sub>3</sub>-D-lactate, <sup>13</sup>C<sub>3</sub>-L-lactate (or 25 µl each when <sup>13</sup>C<sub>u</sub>-glucose and <sup>13</sup>C<sub>3</sub>-D/L-lactate were  
81 combined) for a further 24 hours (all sourced from Sigma Aldrich, Gillingham, UK). Six separate incubation were  
82 performed for each species. Post incubation, samples were stored at -80°C until <sup>13</sup>C-NMR scanning. Broth only

83 (non-inoculated medium) and bacterial samples without  $^{13}\text{C}$ -labelled substrates were used as controls. The amount  
84 of bacterial colony forming units (CFU)/ $\mu\text{l}$  were estimated at time of  $^{13}\text{C}$ -substrate addition using a Helber  
85 counting chamber with Thoma ruling (area =  $1/400\text{ mm}^2$ , depth =  $0.02\text{ mm}$ ; Hawksley Z30000).

#### 86 *NMR acquisition and processing*

87  $^{13}\text{C}$ -NMR samples were prepared containing  $430\text{ }\mu\text{l}$  bacterial sample in a  $5\text{ mm}$  NMR tube (Norell, Morganton,  
88 NC, USA) with  $20\text{ }\mu\text{l}$   $\text{D}_2\text{O}$  (Sigma Aldrich) and  $10\text{ }\mu\text{l}$  of  $200\text{ mM}$   $^{13}\text{C}$ -urea (chemical shift and concentration  
89 reference, Sigma Aldrich) and  $15\text{ }\mu\text{l}$  of penicillin/streptomycin (tube concentration  $\sim 105\text{ units/ml}$  penicillin and  
90  $\sim 105\text{ }\mu\text{g/ml}$  streptomycin, Sigma Aldrich).

91 Spectra were acquired by a  $9.4\text{ T}$  Bruker AVANCE III NMR spectrometer (Bruker BioSpin GmbH, Karlsruhe,  
92 Germany) using a  $^{13}\text{C}\{^1\text{H}\}$  inverse-gated pulse sequence (Spectral Width =  $239\text{ ppm}$ , Number of acquisitions =  
93  $4096$ , Acquisition Time =  $0.5\text{ s}$ , Delay Time =  $2\text{ s}$ , Time domain points =  $24036$ , flip angle =  $16^\circ$ ) at room  
94 temperature ( $21^\circ\text{C}$ ). Each acquired spectrum was apodised with a  $5\text{ Hz}$  exponential line broadening function,  
95 phase and baseline corrected using Bruker Topspin v3.4 software and referenced to the urea signal at a frequency  
96 offset  $\delta = 165.5\text{ ppm}$ .

#### 97 *Metabolite integration and normalisation*

98 Spectrum integrals were determined using a custom peak fitting algorithm (Matlab R2018b, Mathworks, Natick,  
99 MA, USA) to identify and separate overlapping peaks where singlet and doublet peaks were present at a particular  
100 chemical shift (Fig. 1a:  $^{13}\text{C}_3$ -lactate,  $22.1 - 23.05\text{ ppm}$ ;  $^{13}\text{C}_3$ -acetate,  $23.2 - 26.5\text{ ppm}$ ). Doublet peaks were  
101 summed to give an integral for lactate or acetate formed from  $^{13}\text{C}_u$ -glucose metabolism (Fig. 1b).

102 Metabolite integrals were normalised by the concentration of live bacteria present in the incubated samples. This  
103 was estimated by measuring the lactate integral,  $\text{Lac}_{\text{Broth}}$ , from the conversion of broth glucose (i.e. not  $^{13}\text{C}$ -labelled)  
104 after  $48\text{ hours}$  of incubation ( $24\text{ h}$  prior to  $^{13}\text{C}$ -substrate addition plus a further  $24\text{ h}$  incubation post  $^{13}\text{C}$  addition)  
105 and was not observed in broth only samples. For each incubation experiment all integrals were divided by  $\text{Lac}_{\text{Broth}}$ .

#### 106 *Statistical analysis*

107 Statistical analysis was also performed using Matlab with D'Agostino-Pearson's tests for normality of data and a  
108 Kruskal-Wallis with Bonferroni post-hoc test (KW-B) for comparison of multiple groups with  $p < 0.05$  taken as  
109 significant. Comparison between lactobacilli acetate and lactate integrals were performed using either Student's  
110 t-test or Wilcoxon rank-sum test depending on the outcome of the normality test.

## 111 Results and Discussion

112 The average count (CFU) of each bacterial species before incubation with  $^{13}\text{C}$ -labelled substrates was: *L. crispatus*  
113 =  $4.4 \times 10^7 \pm 7.0 \times 10^6$  CFU/ $\mu\text{l}$ ; and *L. jensenii* =  $7.3 \times 10^7 \pm 1.1 \times 10^7$  CFU/ $\mu\text{l}$  ( $p = 0.1$ ). The  $^{13}\text{C}$ -spectra showed  
114 conversion of glucose (natural abundance and  $^{13}\text{C}$ -labelled) to lactate (22.8 ppm) and acetate (23.8 ppm) for both  
115 species ( $n = 6$  per species, Fig. 1). Higher quantities of lactate were produced by *L. jensenii* than *L. crispatus* for  
116 all  $^{13}\text{C}_\text{u}$ -glucose containing incubations although these were not significant (Fig. 2a). The addition of  $^{13}\text{C}_3\text{-L/D-}$   
117 lactate to the incubation suppressed the conversion of  $^{13}\text{C}_\text{u}$ -glucose to lactate (Fig. 2a). *L. jensenii* showed  
118 significantly higher conversion of both enantiomers of  $^{13}\text{C}_3$ -lactate to acetate (23.8 ppm) than *L. crispatus* (*L.*  
119 *crispatus* vs *L. jensenii*: D-lactate to acetate:  $0.26 \pm 0.10$  vs  $1.71 \pm 0.15$ ,  $p < 0.001$ ; L-lactate to acetate:  $0.11 \pm$   
120  $0.04$  vs  $1.68 \pm 0.14$ ,  $p < 0.001$ , Fig. 2b). Six of the *L. jensenii*  $^{13}\text{C}$  spectra ( $^{13}\text{C}$ -glucose,  $n = 2$ ;  $^{13}\text{C}$ -glucose/L-  
121 lactate,  $n = 2$ ;  $^{13}\text{C}$ -glucose/D-lactate,  $n = 1$ ;  $^{13}\text{C}$ -L-lactate,  $n = 1$ ) also showed peaks at 32.4 and 180.6 ppm  
122 (assigned as succinate from HMBC spectra, data not shown).

123 Results show that *Lactobacillus* species that are present in the vagina differentially metabolise  $^{13}\text{C}$ -labelled  
124 glucose and lactate to produce acetate and other metabolites. *L. jensenii* spectra showed that this species was able  
125 to convert more D- or L-lactate to acetate than *L. crispatus*. D-lactate is believed to be a more potent anti-infection  
126 and anti-inflammatory agent than L-lactate (van de Wijkert *et al.*, 2014; Witkin and Linhares, 2017; Witkin *et al.*,  
127 2013) and other studies have shown that *L. crispatus* produces more D-lactate than *L. jensenii* (Amabebe and  
128 Anumba, 2018; van de Wijkert *et al.*, 2014; Witkin and Linhares, 2017; Witkin *et al.*, 2013). This study observed  
129 that *L. jensenii* converted a higher amount of  $^{13}\text{C}_\text{u}$ -glucose to lactate than *L. crispatus*. We did not ascertain if the  
130 lactate produced was either the L- or D isomer. However, this could be done by either an NMR chiral shift reagent  
131 (Zhang *et al.*, 2017a; Zhang *et al.*, 2017b) or absolute quantification of these isomers by enzyme-based  
132 spectrophotometry as we have previously demonstrated (Amabebe *et al.*, 2019; Amabebe *et al.*, 2016a; Cavanagh  
133 *et al.*, 2019).

134 Bacterial load (CFU) was not used for normalisation, as this did not correlate with  $^{13}\text{C}$ -lactate integrals observed  
135 in the spectra (data not shown). Hence, the integrals in this study were normalised based on the assumption that  
136 the observed lactate peak arising from non- $^{13}\text{C}$ -labelled glucose present in the media (singlet peak between the  
137 doublet for lactate at 22.8 ppm, Fig 2a) was proportional to the concentration of live bacteria. Justification for this  
138 approach was made by the observation of significant correlations between the doublet peak  $^{13}\text{C}$ -lactate integrals,  
139 ( $^{13}\text{C}$ -glucose to lactate metabolism), and singlet peak lactate integrals (broth glucose to lactate. Data not shown).

140 Using this approach could potentially underestimate the quantity of live bacteria due to further metabolism of  
141 lactate, e.g. to acetate. Considering acetate concentration is confounded by its presence in the broth, which then  
142 overestimates the bacteria concentration (acetate integrals from broth only spectra would need to be measured to  
143 account for this). Using CFU for normalisation requires careful assessment of the inhomogeneity in bacteria  
144 distribution that can make this method inaccurate. Additionally, the viability of bacteria would need to be  
145 determined, as some of the bacteria will be dead. Furthermore, bacteria that were metabolically active at the start  
146 of the incubation would die over the duration of the incubation leading to an over correction of the integrals.

147 The conversion of glucose and lactate to acetate and succinate by *L. jensenii* compared to *L. crispatus*, suggests  
148 that this may be an important pathomechanism of dysbiosis, altered vaginal pH, infection and infection-associated  
149 spontaneous preterm birth. Elevated amounts of acetate and succinate in the vaginal space is associated with  
150 increased pH and risk of infection such as bacterial vaginosis (Aldunate *et al.*, 2015; Ceccarani *et al.*, 2019), a  
151 known risk factor of preterm birth and other poor reproductive outcomes (Amabebe and Anumba, 2018). Vaginal  
152 bacterial communities dominated by *L. jensenii* usually have higher pH compared to when *L. crispatus*  
153 predominates (Aldunate *et al.*, 2015). We have previously observed that symptomatic women at risk of preterm  
154 birth show elevated cervicovaginal fluid acetate (Amabebe *et al.*, 2016a; Amabebe *et al.*, 2016b), which can be  
155 combined with pro-inflammatory mediators to improve its performance as a predictive marker (Amabebe *et al.*,  
156 2019).

157 These experiments were performed on bacteria that had been freeze thawed. As NMR is a non-destructive  
158 technique, it would be possible to apply this method to live bacteria to sequentially acquire spectra and determine  
159 the rate of conversion of substrates. Whilst it would be important to characterise the most common vaginal strains  
160 of these species, alternative strains could also be characterised. Future studies will be expanded to other  
161 *Lactobacillus* species and strains such as *L. iners* and *L. gasseri* and anaerobes including *Gardnerella*, *Bacteroides*  
162 and *Mobiluncus*, as well as fungi (e.g. *Candida albicans*) that are known to exist within the vaginal milieu.

### 163 **Declarations**

### 164 **Funding:**

165 This research did not receive any specific grant from funding agencies in the public, commercial, or not-for-profit  
166 sectors. However, EA and DA are funded by National Institute for Health Research (NIHR, 17/63/26).

### 167 **Conflict of interest statement:**

168 The authors have no conflicts of interest to declare.

### 169 **Author contributions**

170 This work was conceived and conceptualised by EA and SR. EA and SR acquired and analysed the data with DA  
171 supervising. All authors contributed to drafting and review of the manuscript, and approved the final version for  
172 submission.

173

#### 174 **References:**

175 Aldunate, M., Srbinovski, D., Hearps, A.C., Latham, C.F., Ramsland, P.A., Gugasyan, R., Cone, R.A. and  
176 Tachedjian, G. (2015) Antimicrobial and immune modulatory effects of lactic acid and short chain fatty acids  
177 produced by vaginal microbiota associated with eubiosis and bacterial vaginosis. *Frontiers in Physiology* **6**.

178

179 Amabebe, E. and Anumba, D.O.C. (2018) The Vaginal Microenvironment: The Physiologic Role of Lactobacilli.  
180 **5**.

181

182 Amabebe, E., Reynolds, S., He, X., Wood, R., Stern, V. and Anumba, D.O.C. (2019) Infection/inflammation-  
183 associated preterm delivery within 14 days of presentation with symptoms of preterm labour: A multivariate  
184 predictive model. *PLOS ONE* **14**, e0222455.

185

186 Amabebe, E., Reynolds, S., Stern, V., Stafford, G., Paley, M. and Anumba, D.O. (2016a) Cervicovaginal Fluid  
187 Acetate: A Metabolite Marker of Preterm Birth in Symptomatic Pregnant Women. *Front Med (Lausanne)* **3**, 48.

188

189 Amabebe, E., Reynolds, S., Stern, V.L., Parker, J.L., Stafford, G.P., Paley, M.N. and Anumba, D.O. (2016b)  
190 Identifying metabolite markers for preterm birth in cervicovaginal fluid by magnetic resonance spectroscopy.  
191 *Metabolomics* **12**, 67.

192

193 Bruntz, R.C., Lane, A.N., Higashi, R.M. and Fan, T.W. (2017) Exploring cancer metabolism using stable isotope-  
194 resolved metabolomics (SIRM). *J Biol Chem* **292**, 11601-11609.

195

196 Buescher, J.M., Antoniewicz, M.R., Boros, L.G., Burgess, S.C., Brunengraber, H., Clish, C.B., DeBerardinis, R.J.,  
197 Feron, O., Frezza, C., Ghesquiere, B., Gottlieb, E., Hiller, K., Jones, R.G., Kamphorst, J.J., Kibbey, R.G.,  
198 Kimmelman, A.C., Locasale, J.W., Lunt, S.Y., Maddocks, O.D., Malloy, C., Metallo, C.M., Meuillet, E.J.,  
199 Munger, J., Noh, K., Rabinowitz, J.D., Ralser, M., Sauer, U., Stephanopoulos, G., St-Pierre, J., Tennant, D.A.,  
200 Wittmann, C., Vander Heiden, M.G., Vazquez, A., Vousden, K., Young, J.D., Zamboni, N. and Fendt, S.M. (2015)  
201 A roadmap for interpreting (13)C metabolite labeling patterns from cells. *Curr Opin Biotechnol* **34**, 189-201.

202

203 Cavanagh, M., Amabebe, E. and Anumba, D.O.C. (2019) Differential Cytokine and Metabolite Production by  
204 Cervicovaginal Epithelial Cells Infected with *Lactobacillus crispatus* and *Ureaplasma urealyticum*. *Anaerobe*,  
205 102101.

206

207 Ceccarani, C., Foschi, C., Parolin, C., D'Antuono, A., Gaspari, V., Consolandi, C., Laghi, L., Camboni, T., Vitali,  
208 B., Severgnini, M. and Marangoni, A. (2019) Diversity of vaginal microbiome and metabolome during genital  
209 infections. *Scientific Reports* **9**, 14095.

210

211 Stafford, G.P., Parker, J.L., Amabebe, E., Kistler, J., Reynolds, S., Stern, V., Paley, M. and Anumba, D.O.C.  
212 (2017) Spontaneous Preterm Birth Is Associated with Differential Expression of Vaginal Metabolites by  
213 Lactobacilli-Dominated Microflora. *Front Physiol* **8**, 615.

214

215 van de Wiggert, J.H.H.M., Borgdorff, H., Verhelst, R., Crucitti, T., Francis, S., Verstraelen, H. and Jespers, V.  
216 (2014) The Vaginal Microbiota: What Have We Learned after a Decade of Molecular Characterization? *PLOS*  
217 *ONE* **9**, e105998.

218

- 219 Witkin, S. and Linhares, I. (2017) Why do lactobacilli dominate the human vaginal microbiota? *BJOG: An*  
220 *International Journal of Obstetrics & Gynaecology* **124**, 606-611.
- 221  
222 Witkin, S.S., Mendes-Soares, H., Linhares, I.M., Jayaram, A., Ledger, W.J. and Forney, L.J. (2013) Influence of  
223 vaginal bacteria and D- and L-lactic acid isomers on vaginal extracellular matrix metalloproteinase inducer:  
224 implications for protection against upper genital tract infections. *mBio* **4**, e00460-13.
- 225  
226 Zhang, L., Martins, A.F., Mai, Y., Zhao, P., Funk, A.M., Clavijo Jordan, M.V., Zhang, S., Chen, W., Wu, Y. and  
227 Sherry, A.D. (2017a) Imaging Extracellular Lactate In Vitro and In Vivo Using CEST MRI and a Paramagnetic  
228 Shift Reagent. *Chemistry* **23**, 1752-1756.
- 229  
230 Zhang, L., Martins, A.F., Zhao, P., Tieu, M., Esteban-Gomez, D., McCandless, G.T., Platas-Iglesias, C. and  
231 Sherry, A.D. (2017b) Enantiomeric Recognition of d- and l-Lactate by CEST with the Aid of a Paramagnetic Shift  
232 Reagent. *J Am Chem Soc* **139**, 17431-17437.
- 233  
234  
235  
236  
237  
238  
239  
240  
241



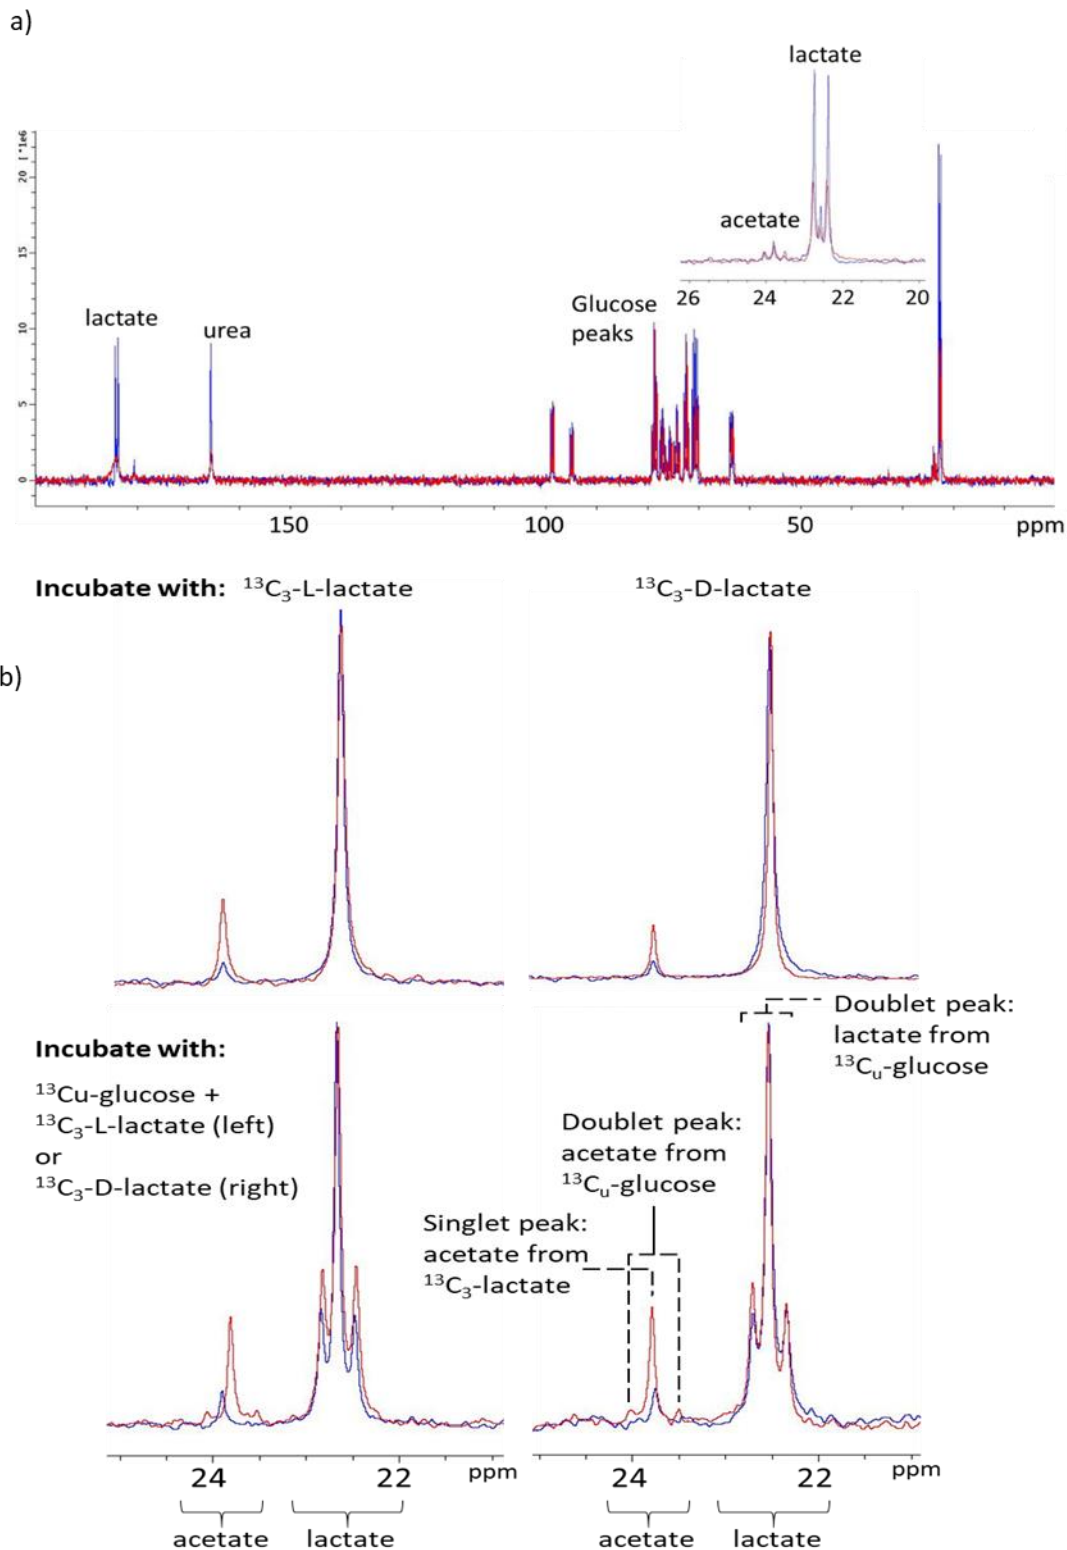

242  
 243 **Figure 1: a)** Overlaid  $^{13}\text{C}$ -NMR spectra of *L. crispatus* (blue) and *L. jensenii* (red) incubated with  $^{13}\text{C}_u$ -glucose.  
 244 Inset shows a zoomed region of the spectrum 20 – 26 ppm. **b)** *L. crispatus* (blue) and *L. jensenii* (red) incubated  
 245 with either: top,  $^{13}\text{C}_3$ -L-lactate (left) or  $^{13}\text{C}_3$ -D-lactate (right); bottom,  $^{13}\text{C}_u$ -glucose +  $^{13}\text{C}_3$ -L-lactate (left) or  $^{13}\text{C}_u$ -  
 246 glucose +  $^{13}\text{C}_3$ -D-lactate (right). Spectra scaled to lactate peak height. Doublet peaks of lactate and acetate arise  
 247 from the conversion of  $^{13}\text{C}_u$ -glucose. Singlet peaks arise from either singly labelled  $^{13}\text{C}_3$ -D/L-lactate or substrates  
 248 with natural abundance  $^{13}\text{C}$  (1.1%).

249

250

251 a)

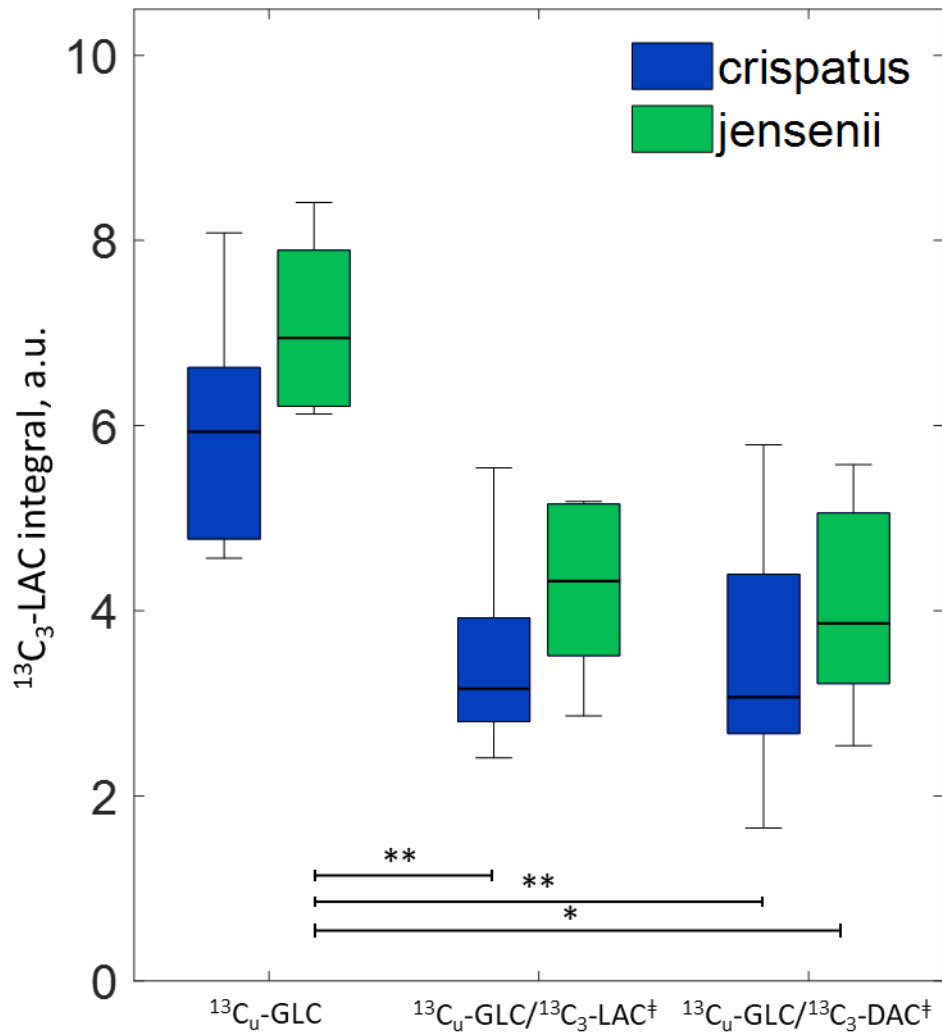

252

253

254

b)

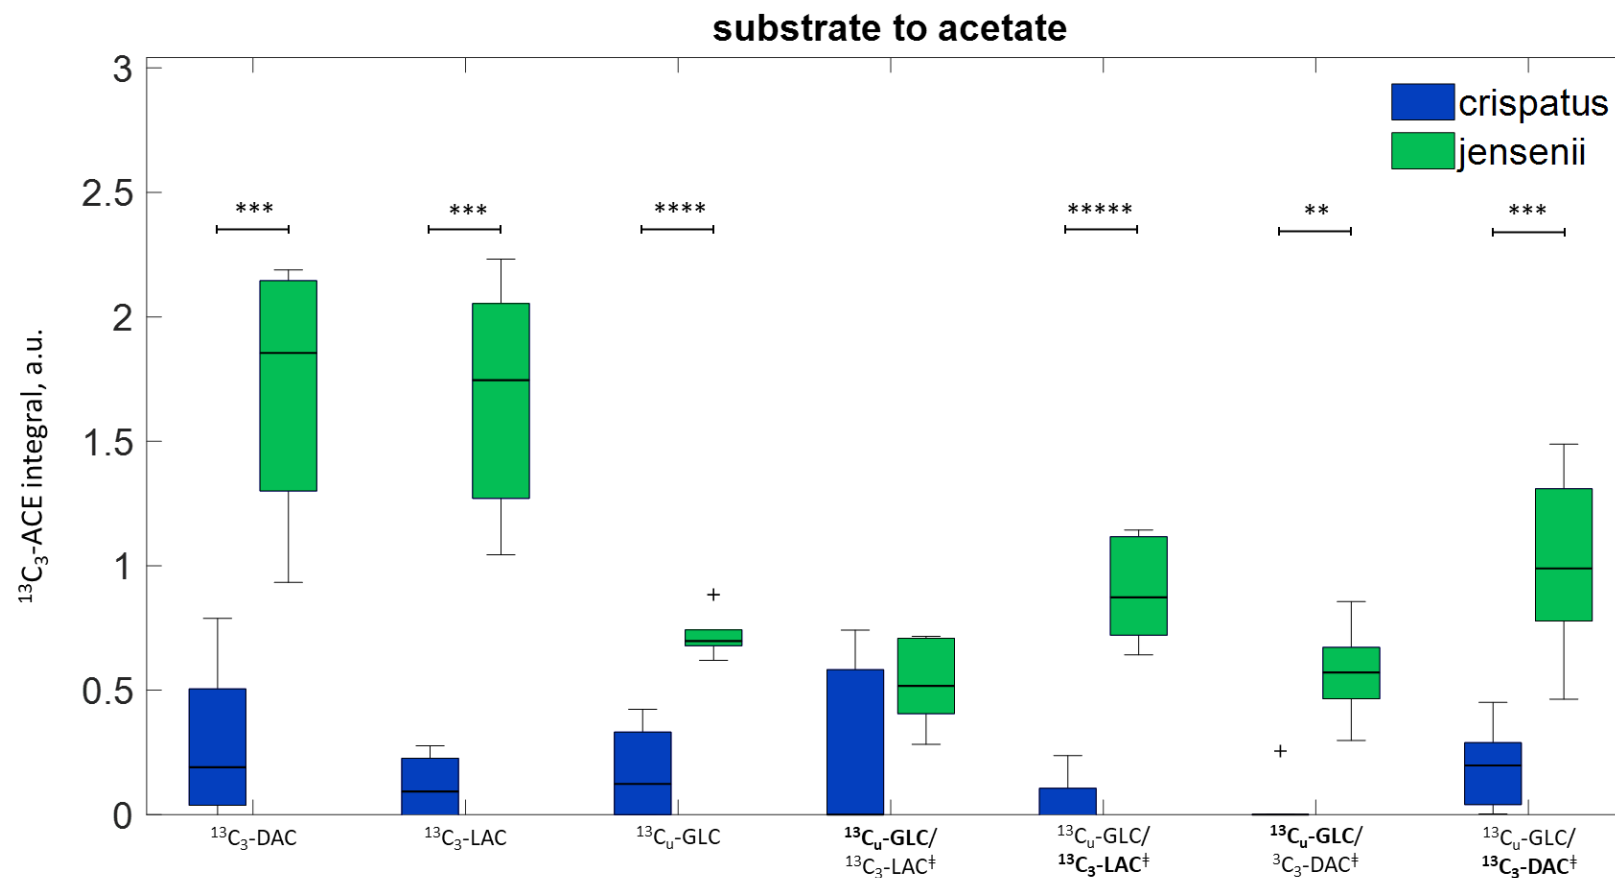

**Figure 2: a)** Normalised  $^{13}\text{C}_3$ -lactate integrals for the conversion of  $^{13}\text{C}_u$ -glucose (GLC),  $^{13}\text{C}_u$ -glucose +  $^{13}\text{C}_3$ -L-lactate (LAC) or  $^{13}\text{C}_u$ -glucose +  $^{13}\text{C}_3$ -D-lactate (DAC).  $^\ddagger$  For combination incubations, the source substrate that is converted to lactate is  $^{13}\text{C}_u$ -glucose (as detected from doublet peak in spectrum). Kruskal-Wallis with Bonferroni post-hoc test: \* $p < 0.05$ , \*\* $p < 0.01$ . **b)** Normalised  $^{13}\text{C}_3$ -acetate (ACE) integrations for the conversion of  $^{13}\text{C}_u$ -glucose (GLC),  $^{13}\text{C}_u$ -glucose +  $^{13}\text{C}_3$ -L-lactate (LAC) or  $^{13}\text{C}_u$ -glucose +  $^{13}\text{C}_3$ -D-lactate (DAC).  $^\ddagger$  For combination incubations, the source substrate that is converted to acetate is highlighted in bold. Boxplots show median, interquartile range (IQR) and whiskers (1.5xIQR). Wilcoxon rank sum: \*\*  $p < 0.01$ , \*\*\*  $p < 0.001$ , \*\*\*\*  $p < 0.0001$ , \*\*\*\*\*  $p < 0.00001$ .
